# Supplementary material
Source: Springer Nature journal article supplement (https://www.springermedizin.de/resource/supplementary/12906_2006_107_MOESM9_ESM.pdf/9524032)

**MDA Content (nmol/g tissue)**

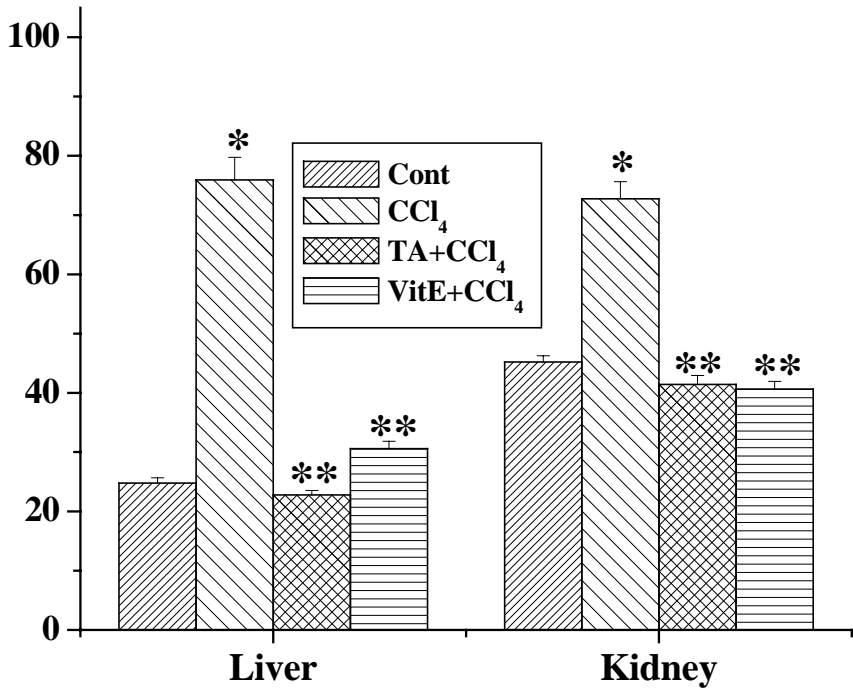

Supplement: MOESM9 [file 9524032]
